# Supplementary material for: Machine Learning Predicts Pathologic Complete Response to Neoadjuvant Chemotherapy for ER+HER2- Breast Cancer: Integrating Tumoral and Peritumoral MRI Radiomic Features
Source: MDPI journal article supplement (doi:10.3390/diagnostics13193031), 2023-09-23
Supplement: s1 [file s1]

**Table S1.** The radiomic features extracted using 3D Slicer PyRadiomics

| Image type  | Feature Class | Num of features |
|-------------|---------------|-----------------|
| original    | First-order   | 18              |
| original    | GLCM          | 24              |
| original    | GLDM          | 14              |
| original    | GLRLM         | 16              |
| original    | GLSZM         | 16              |
| original    | NGTDM         | 5               |
| wavelet-HHH | First-order   | 18              |
| wavelet-HHH | GLCM          | 24              |
| wavelet-HHH | GLDM          | 14              |
| wavelet-HHH | GLRLM         | 16              |
| wavelet-HHH | GLSZM         | 16              |
| wavelet-HHH | NGTDM         | 5               |
| wavelet-HHL | First-order   | 18              |
| wavelet-HHL | GLCM          | 24              |
| wavelet-HHL | GLDM          | 14              |
| wavelet-HHL | GLRLM         | 16              |
| wavelet-HHL | GLSZM         | 16              |
| wavelet-HHL | NGTDM         | 5               |
| wavelet-HLH | First-order   | 18              |
| wavelet-HLH | GLCM          | 24              |
| wavelet-HLH | GLDM          | 14              |
| wavelet-HLH | GLRLM         | 16              |
| wavelet-HLH | GLSZM         | 16              |

|             |             |    |
|-------------|-------------|----|
| wavelet-HLH | NGTDM       | 5  |
| wavelet-HLL | First-order | 18 |
| wavelet-HLL | GLCM        | 24 |
| wavelet-HLL | GLDM        | 14 |
| wavelet-HLL | GLRLM       | 16 |
| wavelet-HLL | GLSZM       | 16 |
| wavelet-HLL | NGTDM       | 5  |
| wavelet-LHH | First-order | 18 |
| wavelet-LHH | GLCM        | 24 |
| wavelet-LHH | GLDM        | 14 |
| wavelet-LHH | GLRLM       | 16 |
| wavelet-LHH | GLSZM       | 16 |
| wavelet-LHH | NGTDM       | 5  |
| wavelet-LHL | First-order | 18 |
| wavelet-LHL | GLCM        | 24 |
| wavelet-LHL | GLDM        | 14 |
| wavelet-LHL | GLRLM       | 16 |
| wavelet-LHL | GLSZM       | 16 |
| wavelet-LHL | NGTDM       | 5  |
| wavelet-LLH | First-order | 18 |
| wavelet-LLH | GLCM        | 24 |
| wavelet-LLH | GLDM        | 14 |
| wavelet-LLH | GLRLM       | 16 |
| wavelet-LLH | GLSZM       | 16 |
| wavelet-LLH | NGTDM       | 5  |

|             |             |    |
|-------------|-------------|----|
| wavelet-LLL | First-order | 18 |
| wavelet-LLL | GLCM        | 24 |
| wavelet-LLL | GLDM        | 14 |
| wavelet-LLL | GLRLM       | 16 |
| wavelet-LLL | GLSZM       | 16 |
| wavelet-LLL | NGTDM       | 5  |

Abbreviations: GLCM, gray-level co-occurrence matrix; GLDM, gray-level dependence matrix; GLRLM, gray-level run-length matrix; GLSZM, gray-level size- zone matrix; NGTDM, neighboring gray tone difference matrix.

**Table S2.** The predictive performance of pCR in the validation cohort using the optimal machine learning models developed for tumoral, peritumoral, and tumoral + peritumoral VOIs in each sequence

| Type                  | Rank | AUC    | Precision | Recall | F1-score | Best Model          |
|-----------------------|------|--------|-----------|--------|----------|---------------------|
| Tumor (Ph2)           | 8    | 0.8594 | 0.9093    | 0.8696 | 0.8840   | SVC                 |
| Tumor (Ph6)           | 15   | 0.7005 | 0.8731    | 0.7826 | 0.8166   | Random Forest       |
| Tumor (T2FS)          | 12   | 0.8018 | 0.8984    | 0.6667 | 0.7327   | SVC                 |
| Peri1 (Ph2)           | 3    | 0.9171 | 0.9335    | 0.8986 | 0.9098   | Logistic Regression |
| Peri1 (Ph6)           | 9    | 0.8422 | 0.9051    | 0.8986 | 0.9015   | K Neighbors         |
| Peri1 (T2FS)          | 13   | 0.7995 | 0.8851    | 0.8406 | 0.8582   | Random Forest       |
| Peri3 (Ph2)           | 6    | 0.8756 | 0.8934    | 0.8696 | 0.8795   | Random Forest       |
| Peri3 (Ph6)           | 10   | 0.8249 | 0.8366    | 0.7826 | 0.8066   | AdaBoost Classifier |
| Peri3 (T2FS)          | 11   | 0.8134 | 0.9215    | 0.6522 | 0.7203   | Logistic Regression |
| Tumor_peri1<br>(Ph2)  | 1    | 0.9447 | 0.9130    | 0.9130 | 0.9130   | SVC                 |
| Tumor_peri1<br>(Ph6)  | 5    | 0.8917 | 0.9193    | 0.9275 | 0.9185   | AdaBoost Classifier |
| Tumor_peri1<br>(T2FS) | 2    | 0.9240 | 0.9442    | 0.9275 | 0.9330   | AdaBoost Classifier |

|             |    |        |        |        |        |                          |
|-------------|----|--------|--------|--------|--------|--------------------------|
| Tumor_peri3 |    |        |        |        |        |                          |
| (Ph2)       | 4  | 0.9009 | 0.8061 | 0.8841 | 0.8433 | Random Forest            |
| Tumor_peri3 |    |        |        |        |        |                          |
| (Ph6)       | 14 | 0.7189 | 0.8450 | 0.7246 | 0.7718 | Decision Tree Classifier |
| Tumor_peri3 |    |        |        |        |        |                          |
| (T2FS)      | 7  | 0.8710 | 0.9193 | 0.9275 | 0.9185 | SVC                      |

Abbreviations: Ph2, T1-weighted fat-suppressed early post-contrast subtraction sequence; Ph6, T1-weighted fat-suppressed delayed post-contrast subtraction sequences; T2FS, T2-weighted fat-suppressed sequence, Peri1, peritumoral region, 1mm; Peri3, peritumoral region, 3mm Tumor\_peri1, tumoral + 1mm peritumoral region; Tumor\_peri3, tumoral + 3mm peritumoral region; SVM, Support Vector Machine.

**Table S3.** Predictive performance of pCR in the validation cohort using the optimal machine learning models based on combination of tumoral and peritumoral regions across sequences

| Type1             | Type2        | Rank | AUC    | Precision | Recall | F1-score | Best Model  |
|-------------------|--------------|------|--------|-----------|--------|----------|-------------|
| Tumor_peri1 (Ph2) | Tumor (Ph6)  | 5    | 0.9378 | 0.9207    | 0.9130 | 0.8824   | SVC         |
| Tumor_peri1 (Ph2) | Tumor (T2FS) | 9    | 0.9194 | 0.9335    | 0.8986 | 0.9098   | SVC         |
| Tumor_peri1 (Ph2) | Peri1 (Ph6)  | 6    | 0.9309 | 0.9329    | 0.9275 | 0.9088   | AdaBoost    |
| Tumor_peri1 (Ph2) | Peri1 (T2FS) | 21   | 0.9032 | 0.9196    | 0.8406 | 0.8655   | SVC         |
| Tumor_peri1 (Ph2) | Peri3 (Ph6)  | 9    | 0.9194 | 0.8981    | 0.9130 | 0.8970   | LGBM        |
| Tumor_peri1 (Ph2) | Peri3 (T2FS) | 1    | 0.9631 | 0.9234    | 0.9275 | 0.9250   | K Neighbors |
| Tumor_peri1       |              |      |        |           |        |          |             |
| Tumor_peri1 (Ph2) | (Ph6)        | 14   | 0.9101 | 0.8981    | 0.9130 | 0.8970   | LGBM        |
| Tumor_peri1       |              |      |        |           |        |          |             |
| Tumor_peri1 (Ph2) | (T2FS)       | 12   | 0.9171 | 0.9137    | 0.8841 | 0.8950   | SVC         |
| Tumor_peri3       |              |      |        |           |        |          |             |
| Tumor_peri1 (Ph2) | (Ph6)        | 6    | 0.9309 | 0.9234    | 0.9275 | 0.9250   | LGBM        |
| Tumor_peri3       |              |      |        |           |        |          |             |
| Tumor_peri1 (Ph2) | (T2FS)       | 2    | 0.9505 | 0.9325    | 0.9275 | 0.9297   | K Neighbors |

|             |              |    |        |        |        |        |               |
|-------------|--------------|----|--------|--------|--------|--------|---------------|
| Tumor_peri1 |              |    |        |        |        |        |               |
| (T2FS)      | Tumor (Ph2)  | 25 | 0.8963 | 0.8987 | 0.8841 | 0.8904 | LGBM          |
| Tumor_peri1 |              |    |        |        |        |        |               |
| (T2FS)      | Tumor (Ph6)  | 51 | 0.8594 | 0.9093 | 0.8696 | 0.8840 | AdaBoost      |
| Tumor_peri1 |              |    |        |        |        |        |               |
| (T2FS)      | Peri1 (Ph2)  | 9  | 0.9194 | 0.9420 | 0.9420 | 0.9420 | Logistic      |
| Tumor_peri1 |              |    |        |        |        |        |               |
| (T2FS)      | Peri1 (Ph6)  | 28 | 0.8940 | 0.9188 | 0.8986 | 0.9062 | LGBM          |
| Tumor_peri1 |              |    |        |        |        |        |               |
| (T2FS)      | Peri3 (Ph2)  | 17 | 0.9078 | 0.9420 | 0.9420 | 0.9420 | LGBM          |
| Tumor_peri1 |              |    |        |        |        |        |               |
| (T2FS)      | Peri3 (Ph6)  | 55 | 0.8525 | 0.9021 | 0.8406 | 0.8624 | Logistic      |
| Tumor_peri1 | Tumor_peri1  |    |        |        |        |        |               |
| (T2FS)      | (Ph6)        | 41 | 0.8779 | 0.8963 | 0.8116 | 0.8411 | AdaBoost      |
| Tumor_peri1 | Tumor_peri3  |    |        |        |        |        |               |
| (T2FS)      | (Ph2)        | 14 | 0.9101 | 0.8981 | 0.9130 | 0.8970 | Random Forest |
| Tumor_peri1 | Tumor_peri3  |    |        |        |        |        |               |
| (T2FS)      | (Ph6)        | 58 | 0.8364 | 0.8816 | 0.8261 | 0.8478 | Logistic      |
| Peri1 (Ph2) | Tumor (Ph6)  | 31 | 0.8894 | 0.9033 | 0.9130 | 0.9065 | LGBM          |
| Peri1 (Ph2) | Tumor (T2FS) | 19 | 0.9055 | 0.9188 | 0.8986 | 0.9062 | Logistic      |
| Peri1 (Ph2) | Peri1 (Ph6)  | 38 | 0.8802 | 0.9021 | 0.8406 | 0.8624 | Logistic      |
| Peri1 (Ph2) | Peri1 (T2FS) | 32 | 0.8871 | 0.9130 | 0.9130 | 0.9130 | K Neighbors   |
|             |              |    |        |        |        |        | Random        |
| Peri1 (Ph2) | Peri3 (Ph6)  | 43 | 0.8733 | 0.8922 | 0.8986 | 0.8951 | Forest        |
| Peri1 (Ph2) | Peri3 (T2FS) | 17 | 0.9078 | 0.9130 | 0.9130 | 0.9130 | Logistic      |
|             | Tumor_peri1  |    |        |        |        |        |               |
| Peri1 (Ph2) | (Ph6)        | 48 | 0.8641 | 0.9455 | 0.9420 | 0.9313 | LGBM          |
|             | Tumor_peri3  |    |        |        |        |        |               |
| Peri1 (Ph2) | (Ph6)        | 32 | 0.8871 | 0.9130 | 0.9130 | 0.9130 | Logistic      |

|                   |              |    |        |        |        |        |               |
|-------------------|--------------|----|--------|--------|--------|--------|---------------|
| Tumor_peri3       |              |    |        |        |        |        | Random        |
| Peri1 (Ph2)       | (T2FS)       | 30 | 0.8917 | 0.9420 | 0.9420 | 0.9420 | Forest        |
|                   |              |    |        |        |        |        | Random        |
| Tumor_peri3 (Ph2) | Tumor (Ph6)  | 71 | 0.7926 | 0.8032 | 0.8551 | 0.8284 | Forest        |
|                   |              |    |        |        |        |        | Random        |
| Tumor_peri3 (Ph2) | Tumor (T2FS) | 43 | 0.8733 | 0.9051 | 0.8986 | 0.9015 | Forest        |
| Tumor_peri3 (Ph2) | Peri1 (Ph6)  | 3  | 0.9401 | 0.9193 | 0.9275 | 0.9185 | LGBM          |
|                   |              |    |        |        |        |        | Random        |
| Tumor_peri3 (Ph2) | Peri1 (T2FS) | 56 | 0.8433 | 0.9033 | 0.9130 | 0.9065 | Forest        |
|                   |              |    |        |        |        |        | Random        |
| Tumor_peri3 (Ph2) | Peri3 (Ph6)  | 21 | 0.9032 | 0.8507 | 0.8841 | 0.8627 | Forest        |
| Tumor_peri3 (Ph2) | Peri3 (T2FS) | 38 | 0.8802 | 0.8346 | 0.8551 | 0.8441 | LGBM          |
| Tumor_peri1       |              |    |        |        |        |        |               |
| Tumor_peri3 (Ph2) | (Ph6)        | 19 | 0.9055 | 0.8802 | 0.8986 | 0.8859 | LGBM          |
| Tumor_peri3       |              |    |        |        |        |        | Random        |
| Tumor_peri3 (Ph2) | (Ph6)        | 43 | 0.8733 | 0.8611 | 0.8696 | 0.8651 | Forest        |
| Tumor_peri3       |              |    |        |        |        |        |               |
| Tumor_peri3 (Ph2) | (T2FS)       | 8  | 0.9274 | 0.9137 | 0.8841 | 0.8950 | K Neighbors   |
| Tumor_peri1 (Ph6) | Tumor (Ph2)  | 12 | 0.9171 | 0.8074 | 0.8986 | 0.8505 | SVC           |
| Tumor_peri1 (Ph6) | Tumor (T2FS) | 36 | 0.8825 | 0.9207 | 0.9130 | 0.8824 | SVC           |
| Tumor_peri1 (Ph6) | Peri1 (T2FS) | 48 | 0.8641 | 0.9196 | 0.8406 | 0.8655 | SVC           |
| Tumor_peri1 (Ph6) | Peri3 (Ph2)  | 23 | 0.8986 | 0.8890 | 0.8551 | 0.8688 | Logistic      |
|                   |              |    |        |        |        |        | Random        |
| Tumor_peri1 (Ph6) | Peri3 (T2FS) | 41 | 0.8779 | 0.9130 | 0.9130 | 0.9130 | Forest        |
| Tumor_peri3       |              |    |        |        |        |        | Random        |
| Tumor_peri1 (Ph6) | (T2FS)       | 38 | 0.8802 | 0.9130 | 0.9130 | 0.9130 | Forest        |
| Peri3 (Ph2)       | Tumor (Ph6)  | 35 | 0.8836 | 0.9171 | 0.8261 | 0.8547 | Decision Tree |
|                   |              |    |        |        |        |        | Random        |
| Peri3 (Ph2)       | Tumor (T2FS) | 59 | 0.8318 | 0.8915 | 0.7826 | 0.8199 | Forest        |

|             |              |    |        |        |        |        |          |
|-------------|--------------|----|--------|--------|--------|--------|----------|
|             |              |    |        |        |        |        | Random   |
| Peri3 (Ph2) | Peri1 (Ph6)  | 23 | 0.8986 | 0.9335 | 0.8986 | 0.9098 | Forest   |
|             |              |    |        |        |        |        | Random   |
| Peri3 (Ph2) | Peri1 (T2FS) | 51 | 0.8594 | 0.8785 | 0.8116 | 0.8374 | Forest   |
| Peri3 (Ph2) | Peri3 (Ph6)  | 47 | 0.8652 | 0.8915 | 0.7826 | 0.8199 | AdaBoost |
| Peri3 (Ph2) | Peri3 (T2FS) | 16 | 0.9090 | 0.9281 | 0.7536 | 0.8016 | AdaBoost |
|             | Tumor_peri3  |    |        |        |        |        | Random   |
| Peri3 (Ph2) | (Ph6)        | 62 | 0.8249 | 0.8642 | 0.8261 | 0.8425 | Forest   |
|             | Tumor_peri3  |    |        |        |        |        | Random   |
| Peri3 (Ph2) | (T2FS)       | 46 | 0.8687 | 0.8915 | 0.7826 | 0.8199 | Forest   |
| Tumor_peri3 |              |    |        |        |        |        |          |
| (T2FS)      | Tumor (Ph2)  | 28 | 0.8940 | 0.9329 | 0.9275 | 0.9088 | SVC      |
| Tumor_peri3 |              |    |        |        |        |        | Random   |
| (T2FS)      | Tumor (Ph6)  | 73 | 0.7857 | 0.8890 | 0.8551 | 0.8688 | Forest   |
| Tumor_peri3 |              |    |        |        |        |        | Random   |
| (T2FS)      | Peri1 (Ph6)  | 34 | 0.8848 | 0.9188 | 0.8986 | 0.9062 | Forest   |
| Tumor_peri3 |              |    |        |        |        |        | Random   |
| (T2FS)      | Peri3 (Ph6)  | 69 | 0.7995 | 0.8872 | 0.7536 | 0.7985 | Forest   |
| Tumor_peri3 | Tumor_peri3  |    |        |        |        |        | Random   |
| (T2FS)      | (Ph6)        | 74 | 0.7834 | 0.8609 | 0.8116 | 0.8324 | Forest   |
|             |              |    |        |        |        |        | Random   |
| Tumor (Ph2) | Tumor (Ph6)  | 67 | 0.8018 | 0.8261 | 0.8261 | 0.8261 | Forest   |
| Tumor (Ph2) | Tumor (T2FS) | 54 | 0.8571 | 0.8798 | 0.6957 | 0.7549 | Logistic |
| Tumor (Ph2) | Peri1 (Ph6)  | 3  | 0.9401 | 0.9137 | 0.8841 | 0.8950 | AdaBoost |
| Tumor (Ph2) | Peri1 (T2FS) | 36 | 0.8825 | 0.8934 | 0.8696 | 0.8795 | Logistic |
| Tumor (Ph2) | Peri3 (Ph6)  | 61 | 0.8272 | 0.8074 | 0.8986 | 0.8505 | SVC      |
| Tumor (Ph2) | Peri3 (T2FS) | 25 | 0.8963 | 0.8981 | 0.9130 | 0.8970 | SVC      |
|             | Tumor_peri3  |    |        |        |        |        | Random   |
| Tumor (Ph2) | (Ph6)        | 57 | 0.8410 | 0.8851 | 0.8406 | 0.8582 | Forest   |

|              |                   |    |        |        |        |        |               |
|--------------|-------------------|----|--------|--------|--------|--------|---------------|
| Peri1 (Ph6)  | Tumor (T2FS)      | 51 | 0.8594 | 0.9207 | 0.9130 | 0.8824 | SVC           |
| Peri1 (Ph6)  | Peri1 (T2FS)      | 59 | 0.8318 | 0.8915 | 0.7826 | 0.8199 | SVC           |
| Peri1 (Ph6)  | Peri3 (T2FS)      | 25 | 0.8963 | 0.9021 | 0.8406 | 0.8624 | Random Forest |
| Peri3 (Ph6)  | Tumor (T2FS)      | 66 | 0.8111 | 0.8933 | 0.6087 | 0.6847 | SVC           |
| Peri3 (Ph6)  | Peri1 (T2FS)      | 50 | 0.8618 | 0.9234 | 0.9275 | 0.9250 | Random Forest |
| Peri3 (Ph6)  | Peri3 (T2FS)      | 70 | 0.7972 | 0.8582 | 0.5217 | 0.6100 | Logistic      |
| Peri3 (T2FS) | Tumor (Ph6)       | 67 | 0.8018 | 0.8915 | 0.7826 | 0.8199 | Random Forest |
| Peri3 (T2FS) | Tumor_peri3 (Ph6) | 75 | 0.7097 | 0.8148 | 0.7681 | 0.7900 | Random Forest |
| Tumor (T2FS) | Tumor (Ph6)       | 63 | 0.8226 | 0.8872 | 0.7536 | 0.7985 | Random Forest |
| Tumor (T2FS) | Tumor_peri3 (Ph6) | 72 | 0.7880 | 0.8725 | 0.8551 | 0.8629 | LGBM          |
| Peri1 (T2FS) | Tumor (Ph6)       | 64 | 0.8203 | 0.8922 | 0.8986 | 0.8951 | Random Forest |
| Peri1 (T2FS) | Tumor_peri3 (Ph6) | 65 | 0.8157 | 0.9207 | 0.9130 | 0.8824 | SVC           |

Abbreviations: Ph2, second-post contrast subtraction image; Ph6, sixth-post contrast subtraction image; T2FS, T2 weighted fat-saturated image, Peri1, peritumoral region, 1mm; Peri3, peritumoral region, 3mm Tumor\_peri1, tumoral + 1mm peritumoral region; Tumor\_peri3, tumoral + 3mm peritumoral region; SVM, Support Vector Machine; LGBM, Light Gradient-Boosting Machine.

**Table S4.** pCR prediction performances of the clinical models in the validation cohort

| Features   | AUC    | Precision | Recall | F1-score | Model                  |
|------------|--------|-----------|--------|----------|------------------------|
| Age        | 0.6261 | 0.8766    | 0.7750 | 0.8180   | K Neighbors Classifier |
| Tumor size | 0.8063 | 0.9067    | 0.7500 | 0.8063   | Logistic Regression    |



|                    |        |        |        |        |                          |
|--------------------|--------|--------|--------|--------|--------------------------|
| Age + Tumor size   | 0.6667 | 0.8936 | 0.6000 | 0.6933 | Logistic Regression      |
| ER expression      | 0.6847 | 0.8708 | 0.7250 | 0.7847 | Decision Tree Classifier |
| PR expression      | 0.6396 | 0.8680 | 0.7000 | 0.7675 | Random Forest Classifier |
| ER + PR expression | 0.5315 | 0.8766 | 0.7750 | 0.8180 | K Neighbors Classifier   |

Abbreviations: ER, estrogen receptor; PR progesterone receptor
